# Supplementary material
Source: Research Square preprint supplement (doi:10.21203/rs.3.rs-8933571/v1)
Supplement: Supplementary file 1 [file a4d47611e7972da906f12823.docx]

**Depression as a comorbidity in Type 2 Diabetes Mellitus: Prevalence and Relationship with Glycaemic Status and Quality of Life among patients attending a Nigerian Primary Care Clinic**

**STUDY QUESTIONNAIRE**

**SECTION A – SOCIO-DEMOGRAPHIC DATA**

**1. Age (as at last birthday):** …………………………………………………………………………….

**2. Sex:** 1 = Male 2 = Female

**3. Religion:** 1 = Islam 2 = Christianity 3 = Traditional

4 = Others (Pls Specify) ……………

**4. Ethnicity:** 1 = Yoruba 2 = Hausa 3 = Ibo

4 = Others (Pls Specify) ……………

**5. Marital Status:**

1 = Single 2 = Married 3 = Separated 4 = divorced 5 = Widowed

**6. Level of Education:**

1= None 2 = Primary 3 = Secondary 4 = Tertiary Education

**7. Occupation:** ………………………………………………………………………………………..

**8. Perceived employment status: -** With regards to employment, how do you consider yourself?

1. Gainfully / Satisfactorily employed 4. DEPENDANT/RETIRED
2. Under-employed / Not satisfactorily employed
3. Un-employed

**9. Total income per month** [from all sources]: 1 = < minimum wage 2. = above min wage

**SECTION B – MEDICAL HISTORY**

**10. When were you diagnosed as having diabetes?** Year __________

How long ago? ____________

**11. Which of the following are you using for treatment of your diabetes?**

1. Diet 1 = Yes 2 = No
2. Oral drug(s) 1 = Yes 2 = No
3. Insulin Injection 1 = Yes 2 = No
4. Local herbs / Herbal or nutritional supplements 1 = Yes 2 = No
5. **Others (Please specify) _____________________________________________**

**12. Any known family history of Diabetes Mellitus?** 1 = Yes 2 = No

**13. Which of these other health problems have you been told you have?**

a. Hypertension 1 = Yes 2 = No

b. Heart disease / Heart failure 1 = Yes 2 = No

c. Stroke / TIA 1 = Yes 2 = No

d. Arthritis 1 = Yes 2 = No

Others: Please specify _______________________________

**SECTION C – SELF-REPORTED ADHERENCE AND LIFESTYLE HABITS**

**14. Names of your anti-diabetic drugs and their doses**

| **NAME** | Dose (How many times a day?) |
| --- | --- |
| Metfrormin: **1 = Yes 2 = No** |  |
| Glimeperide/Daonil **1 = Yes 2 = No** |  |
| Vildagiptin **1 = Yes 2 = No** |  |
| ALL **1 = Yes 2 = No** |  |

**15. IN THE LAST 7 DAYS, how many times have you missed taking your medications?** EXPECTED____

MISSED____

**16. Smoking history:** 1 = I have never smoked

2 = Smoked in the past but has stopped

3 = I still smoke

**17. Do you drink alcohol (including beer or wine)?** 1 = Yes 2 = No

**18. If YES above, What type ___________________ How much in a week (in mls) _________**

**19. How many times a week do you usually do 30 minutes or more of moderate-intensity physical activities that make you breathe a little harder than usual? (e.g., walking briskly, carrying light loads, bicycling at a regular pace, or doubles tennis).**

1 = None or < 30 mins per week

2 = 1-2 times a week

3 = 3-4 times a week

4 = 5 or more times a week

**SECTION D - WHOQOL-BREF**

The following questions ask how you feel about your quality of life. Please choose the answer that appears most appropriate. If you are unsure about which response to give to a question, the first response you think of is often the best one. Please keep in mind your standards, hopes, pleasures and concerns.

**The following questions ask about your overall quality of life and general health.**

|  |  | Very poor – 1 | Poor  2 | Neither poor nor good - 3 | Good  4 | Very Good  5 |
| --- | --- | --- | --- | --- | --- | --- |
| D1 | How would you rate your quality of life? |  |  |  |  |  |

|  |  | Very dissatisfied  1 | Dissatisfied  2 | Neither satisfied nor dissatisfied- 3 | Satisfied  4 | Very satisfied  5 |
| --- | --- | --- | --- | --- | --- | --- |
| D2 | How satisfied are you with your health? |  |  |  |  |  |

**The following questions ask about how much you have experienced certain things in the last four weeks.**

|  |  | Not at all  1 | A little  2 | A moderate amount - 3 | Very much - 4 | An extreme amount - 5 |
| --- | --- | --- | --- | --- | --- | --- |
| D3 | To what extent do you feel that physical pain prevents you from doing what you need to do? | **5** | **4** | **3** | **2** | **1** |
| D4 | How much do you need any medical treatment to function in your daily life? | **5** | **4** | **3** | **2** | **1** |
| D5 | How much do you enjoy life? |  |  |  |  |  |
| D6 | To what extent do you feel your life to be meaningful? |  |  |  |  |  |

|  |  | Not at all  1 | A little  2 | A moderate amount - 3 | Very much - 4 | Extremely  5 |
| --- | --- | --- | --- | --- | --- | --- |
| D7 | How well are you able to concentrate? |  |  |  |  |  |
| D8 | How safe do you feel in your daily life? |  |  |  |  |  |
| D9 | How healthy is your physical environment? |  |  |  |  |  |

**The following questions ask about how completely you experience or were able to do certain things in the last four weeks.**

|  |  | Not at all  1 | A little  2 | A moderate amount - 3 | Very much - 4 | An extreme amount - 5 |
| --- | --- | --- | --- | --- | --- | --- |
| D10 | Do you have enough energy for everyday life? |  |  |  |  |  |
| D11 | Are you able to accept your bodily appearance? |  |  |  |  |  |
| D12 | Have you enough money to meet your needs? |  |  |  |  |  |
| D13 | How available to you is the information that you need in your day-to-day life? |  |  |  |  |  |
| D14 | To what extent do you have the opportunity for leisure activities? |  |  |  |  |  |

|  |  | Very poor | Poor | Neither poor nor good | Good | Very Good |
| --- | --- | --- | --- | --- | --- | --- |
| D15 | How well are you able to get around? |  |  |  |  |  |

**The following questions ask about how good or satisfied you have felt about various aspects of your life over the last two weeks**

|  |  | Very dissatisfied  1 | Dissatisfied  2 | Neither satisfied nor dissatisfied- 3 | Satisfied  4 | Very satisfied  5 |
| --- | --- | --- | --- | --- | --- | --- |
| D16 | How satisfied are you with your sleep? |  |  |  |  |  |
| D17 | How satisfied are you with your ability to perform your daily living activities? |  |  |  |  |  |
| D18 | How satisfied are you with your capacity for work? |  |  |  |  |  |
| D19 | How satisfied are you with yourself? |  |  |  |  |  |
| D20 | How satisfied are you with your personal relationships? |  |  |  |  |  |
| D21 | How satisfied are you with your sex life? |  |  |  |  |  |
| D22 | How satisfied are you with the support you get from your friends? |  |  |  |  |  |
| D23 | How satisfied are you with the conditions of your living place? |  |  |  |  |  |
| D24 | How satisfied are you with your access to health services? |  |  |  |  |  |
| D25 | How satisfied are you with your transport? |  |  |  |  |  |

**The following question refers to how often you have felt or experienced certain things in the last four weeks.**

|  |  | Never | Seldom | Quite Often | Very often | Always |
| --- | --- | --- | --- | --- | --- | --- |
| D26 | How often do you have negative feelings such as blue mood, despair, anxiety, depression? | **5** | **4** | **3** | **2** | **1** |

**SECTION E – PATIENT HEALTH QUESTIONNAIRE (PHQ-9)**

**Over the last 2 weeks, how often have you been bothered by any of the following problems?**

|  |  | **Not at all**  **= 0** | **Several days(about half the days)**  **= 1** | **Most days (More than half the days)**  **2** | **Nearly every day**  **= 3** |
| --- | --- | --- | --- | --- | --- |
| E1 | Little interest or pleasure in doing things |  |  |  |  |
| E2 | Feeling down, depressed, or hopeless |  |  |  |  |
| E3 | Trouble falling or staying asleep, or sleeping too much |  |  |  |  |
| E4 | Feeling tired or having little energy |  |  |  |  |
| E5 | Poor appetite or overeating |  |  |  |  |
| E6 | Feeling bad about yourself, or that you are a failure, or have let yourself for your family down |  |  |  |  |
| E7 | Trouble concentrating on things, such as reading the newspaper or watching television |  |  |  |  |
| E8 | Moving or speaking so slowly that other people could have noticed? Or the opposite - being so fidgety or restless that you have been moving around a lot more than usual |  |  |  |  |
| E9 | Thoughts that you would be better off dead or of hurting yourself in some way |  |  |  |  |

**SECTION F – CLINICAL MEASURES**

**1) Weight (kg) __________________**

**2) Height (m) __________________**

**3) BMI (kg/m2) __________________**

**4) Systolic BP (SBP) 1 __________________ (mmHg)**

**5) Systolic BP (SBP) 2 __________________ (mmHg)**

**6) Diastolic BP (DBP) 1 __________________ (mmHg)**

**7) Diastolic BP (DBP) 2 __________________ (mmHg)**

**8) Fasting Blood sugar __________________**
